# Supplementary material
Source: publisher figshare collection journal article supplement (https://acs.figshare.com/ndownloader/files/13710137)
Supplement: Supplementary file 1 [file 13710137]

## Supporting Information

# Scalable Solvothermal Synthesis of Superparamagnetic Fe<sub>3</sub>O<sub>4</sub> Nanoclusters for bio-separation and theragnostic probes

*Jeonghyo Kim<sup>1, †</sup>, Van Tan Tran<sup>1, †</sup>, Sangjin Oh<sup>1, †</sup>, Chang-Seok Kim<sup>1</sup>, Jong Chul Hong<sup>2</sup>, SungIl Kim<sup>3</sup>, Young-Seon Joo<sup>3</sup>, Saem Mun<sup>3</sup>, Myoung-Ho Kim<sup>3</sup>, Jae-Wan Jung<sup>3</sup>, Jiyoung Lee<sup>4</sup>, Yong Seok Kang<sup>4</sup>, Ja-Won Koo<sup>4</sup>, Jaebeom Lee<sup>5,\*</sup>*

<sup>1</sup>Departments of Cogno-Mechatronics Engineering, Pusan National University, Busan, 46241, Republic of Korea

<sup>2</sup>Department of Otolaryngology, Head and Neck Surgery, College of Medicine, Dong-A University, Busan, 49201, Republic of Korea

<sup>3</sup>AMO LIFE SCIENCE Co., Ltd., Seoul, 06527, Republic of Korea

<sup>4</sup>Department of Otorhinolaryngology-Head and Neck Surgery, Seoul National University Bundang Hospital, Seongnam, 13620, Republic of Korea

<sup>5</sup>Department of Chemistry, Chungnam National University, Daejeon, 34134, Republic of Korea

<sup>†</sup>These authors contributed equally.

\*Corresponding author

Email: nanoleelab@cnu.ac.kr

## TABLE OF CONTENTS

1. **Table S1.** Reaction conditions for size tunability evaluation.
2. **Table S2.** Reaction conditions for scalability evaluation.
3. **Table S3.** Quantification of conjugated-antibody amount.
4. **Figure S1.** Representative SEM images of the fabricated Fe<sub>3</sub>O<sub>4</sub> nanoclusters at different magnifications.
5. **Figure S2.** (a) The nitrogen adsorption-desorption isotherm, and (b) pore size distribution curve of MNCs.
6. **Figure S3.** Schematic diagram of the coercivity ( $H_c$ ) behavior as a function of particle diameter ( $D$ ), where  $D_s$  is the diameter at which a transition from multi-domain to single-domain occurs, and  $D_{SPM}$  is the zero-coercivity diameter.
7. **Figure S4.** (a) pH-dependent zeta-potential curves, and (b) Zeta-potential of MNCs in aqueous dispersions.
8. **Figure S5.** Optical microscopy images of magnetic nanoclusters (MNCs) in different buffer solutions: (a) deionized water (DIW), (b) MES (pH 5.5), (c) phosphate buffered saline with Tween-20 (PBST, pH 7.4), and (d) mixture of PBST and MES (pH 6.8).
9. **Figure S6.** Zeta-potentials of the Fe<sub>3</sub>O<sub>4</sub> nanospheres synthesized with a Fe precursor concentration of 0.05 M (a), 0.1 M (b), 0.2 M (c), and 0.3 M (d).
10. **Figure S7.** Magnetization curves of Fe<sub>3</sub>O<sub>4</sub> and Fe<sub>3</sub>O<sub>4</sub>@SiO<sub>2</sub> samples measured at 300 K.
11. **Figure S8.** Capture efficiency of Ab-conjugated silica-MNCs for vibrio cell samples.
12. **Figure S9.** SEM, TEM and size distribution histogram of (a-c) Fe<sub>3</sub>O<sub>4</sub>, (d-f) Fe<sub>3</sub>O<sub>4</sub>@SiO<sub>2</sub>, and (g-i) Eu doped Fe<sub>3</sub>O<sub>4</sub>@SiO<sub>2</sub>. Size distribution of nanoclusters obtained by measuring 100 particles from TEM images.
13. **Figure S10.** (a) Absorption, excitation and emission spectra of Eu(DBM)<sub>3</sub>Phen, and (b) its FT-IR spectrum.
14. **Figure S11.** Bovine serum albumin (BSA) standard curve for the BCA protein assay.
15. **Supplementary Movie S1.** Video clip showing the RBC separation from human whole blood.

**Table S1.** Reaction conditions for size tunability evaluation.

|   | Conc. of FeCl <sub>3</sub> (M) | Reaction volume (mL) | Na <sub>3</sub> Cit (g) | NaAc (g) | Reaction Temp. (°C) | Reaction Time (h) |
|---|--------------------------------|----------------------|-------------------------|----------|---------------------|-------------------|
| a | 0.05                           | 20                   | 0.2                     | 1.2      | 200°C               | 10                |
| b | 0.1                            | 20                   | 0.2                     | 1.2      | 200°C               | 10                |
| c | 0.2                            | 20                   | 0.2                     | 1.2      | 200°C               | 10                |
| d | 0.3                            | 20                   | 0.2                     | 1.2      | 200°C               | 10                |

**Table S2.** Reaction conditions for scalability evaluation.

| Reaction volume (mL) | Amount of FeCl <sub>3</sub> (g) | Conc. of FeCl <sub>3</sub> (M) | Na <sub>3</sub> Cit (g) | NaAc (g) | Reaction Temp. (°C) | Reaction Time (h) |
|----------------------|---------------------------------|--------------------------------|-------------------------|----------|---------------------|-------------------|
| 20                   | 0.540                           | 0.1                            | 0.2                     | 1.2      | 200°C               | 10                |
| 40                   | 1.081                           | 0.1                            | 0.4                     | 2.4      | 200°C               | 10                |
| 200                  | 5.406                           | 0.1                            | 2                       | 12       | 200°C               | 10                |

**Table S3.** Quantification of conjugated-antibody amount.

|                      | OD@562 nm (a.u.) | Conjugated-antibody amount/1 mg of particles (µg) |
|----------------------|------------------|---------------------------------------------------|
| Anti-RBC antibody    | 0.416            | 30.7                                              |
| Anti-CRP antibody    | 0.413            | 30.5                                              |
| Anti-Vibrio antibody | 0.471            | 35                                                |

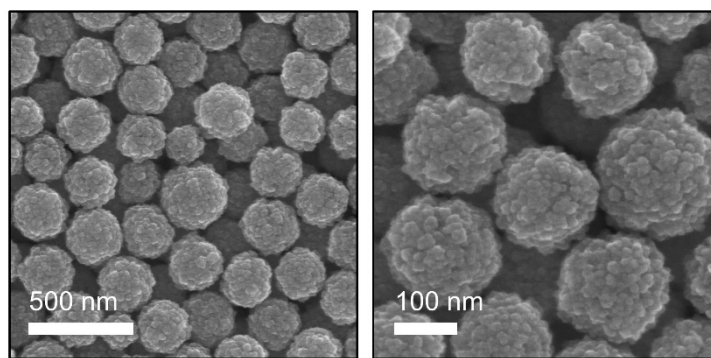

**Figure S1.** Representative SEM images of the fabricated  $\text{Fe}_3\text{O}_4$  nanoclusters at different magnifications.

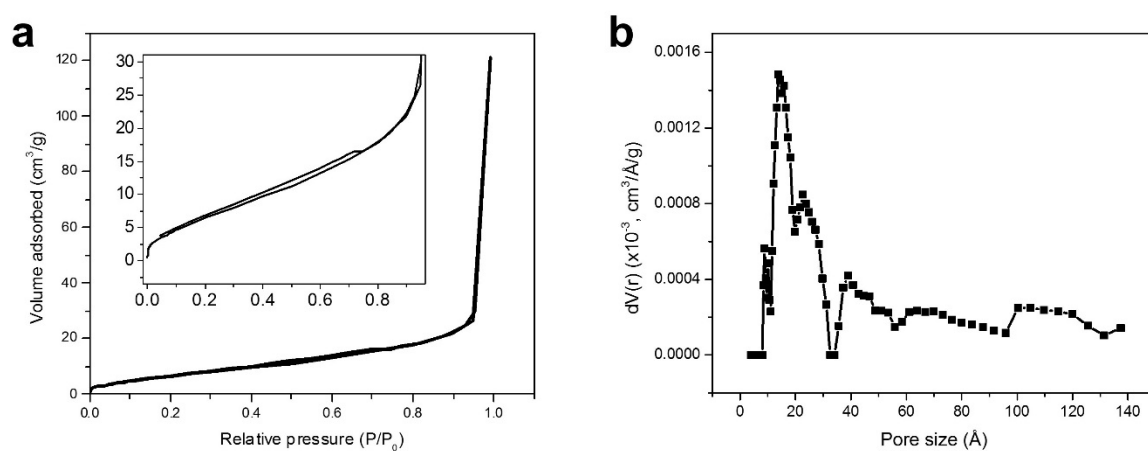

**Figure S2.** (a) The nitrogen adsorption-desorption isotherm, and (b) pore size distribution curve of MNCs.

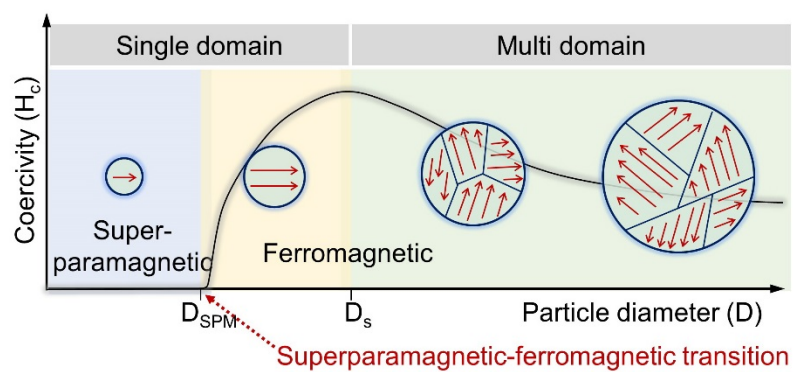

**Figure S3.** Schematic diagram of the coercivity ( $H_c$ ) behavior as a function of particle diameter ( $D$ ), where  $D_s$  is the diameter at which a transition from multi-domain to single-domain occurs, and  $D_{SPM}$  is the zero-coercivity diameter.

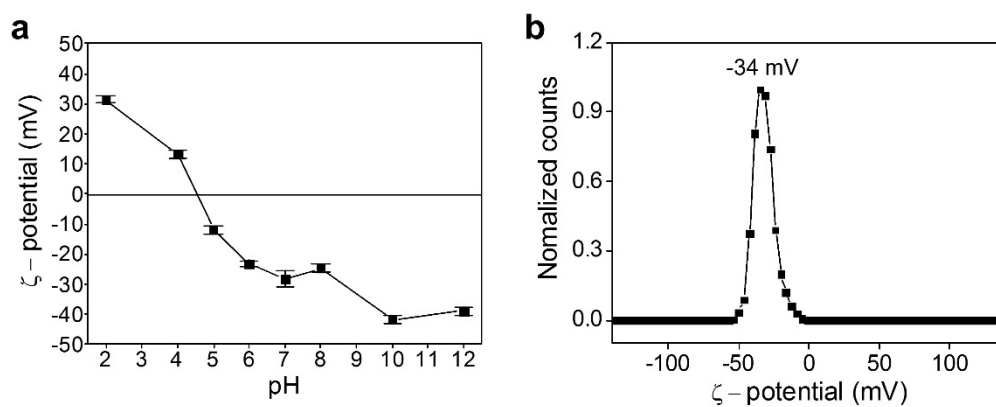

**Figure S4.** (a) pH-dependent zeta-potential curves, and (b) Zeta-potential of MNCs in aqueous dispersions.

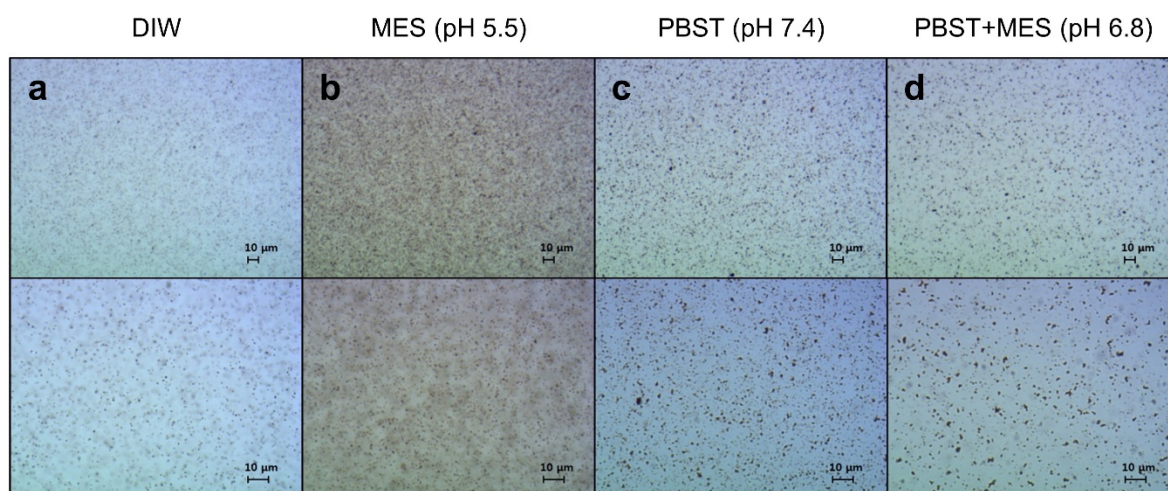

**Figure S5.** Optical microscopy images of magnetic nanoclusters (MNCs) in different buffer solutions: (a) deionized water (DIW), (b) MES (pH 5.5), (c) phosphate buffered saline with Tween-20 (PBST, pH 7.4), and (d) mixture of PBST and MES (pH 6.8).

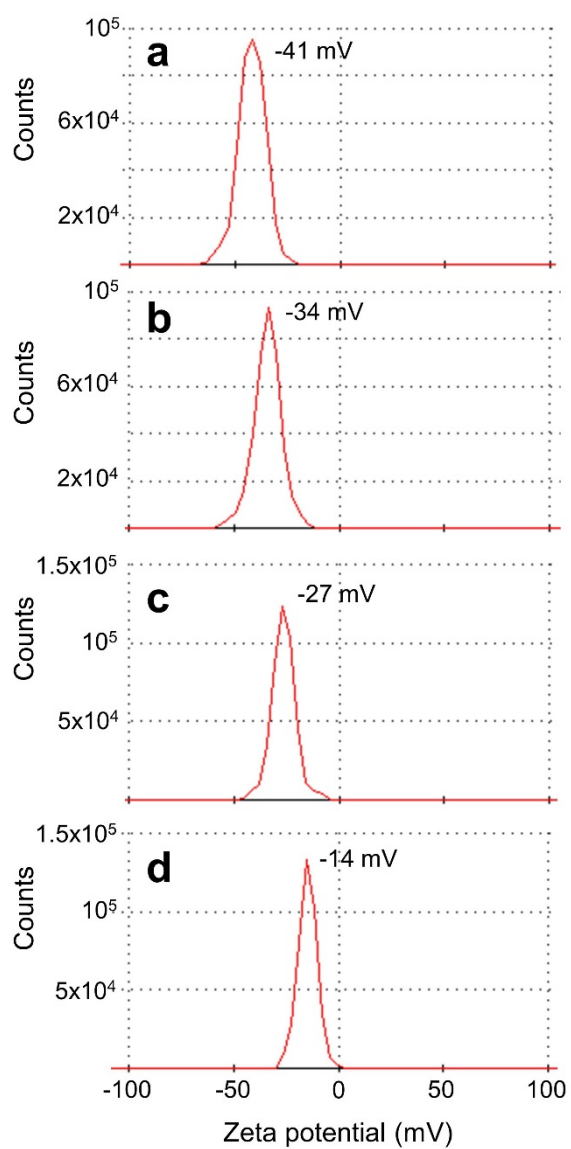

**Figure S6.** Zeta-potentials of the Fe<sub>3</sub>O<sub>4</sub> nanospheres synthesized with a Fe precursor concentration of 0.05 M (a), 0.1 M (b), 0.2 M (c), and 0.3 M (d).

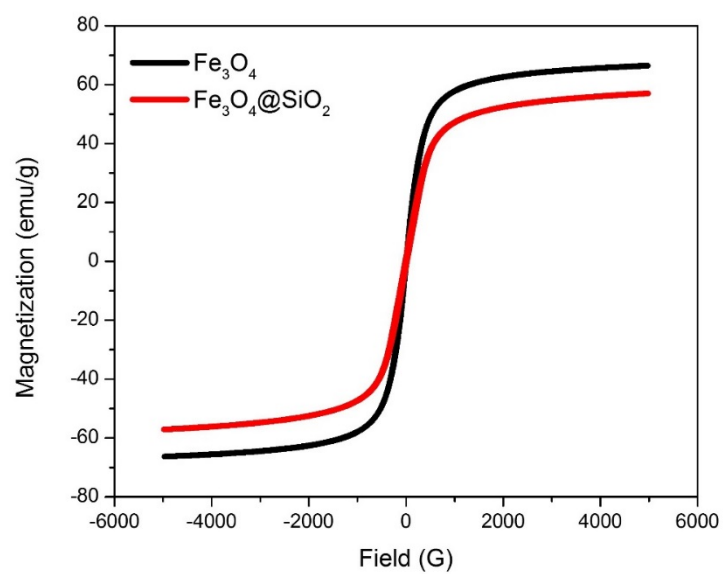

**Figure S7.** Magnetization curves of  $\text{Fe}_3\text{O}_4$  and  $\text{Fe}_3\text{O}_4@\text{SiO}_2$  samples measured at 300 K.



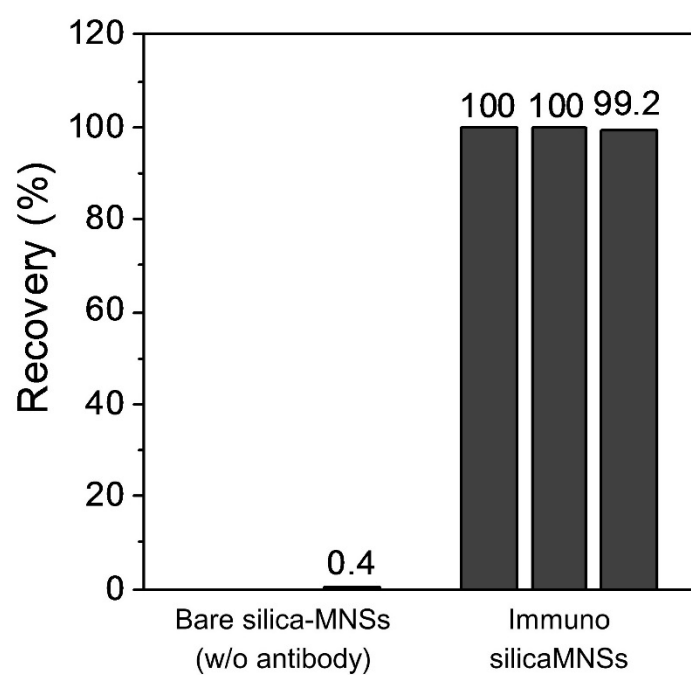

**Figure S8.** Capture efficiency of Ab-conjugated silica-MNSs for vibrio cell samples.

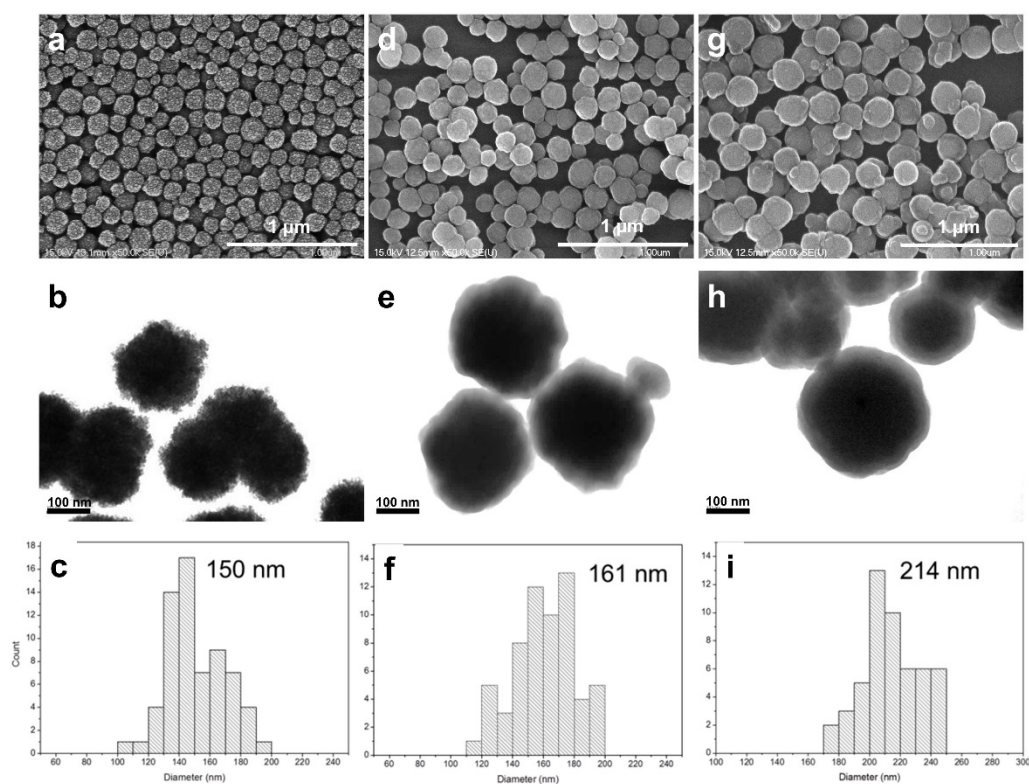

**Figure S9.** SEM, TEM and size distribution histogram of (a-c)  $\text{Fe}_3\text{O}_4$ , (d-f)  $\text{Fe}_3\text{O}_4@\text{SiO}_2$ , and (g-i) Eu doped  $\text{Fe}_3\text{O}_4@\text{SiO}_2$ . Size distribution of nanoclusters obtained by measuring 100 particles from TEM images.

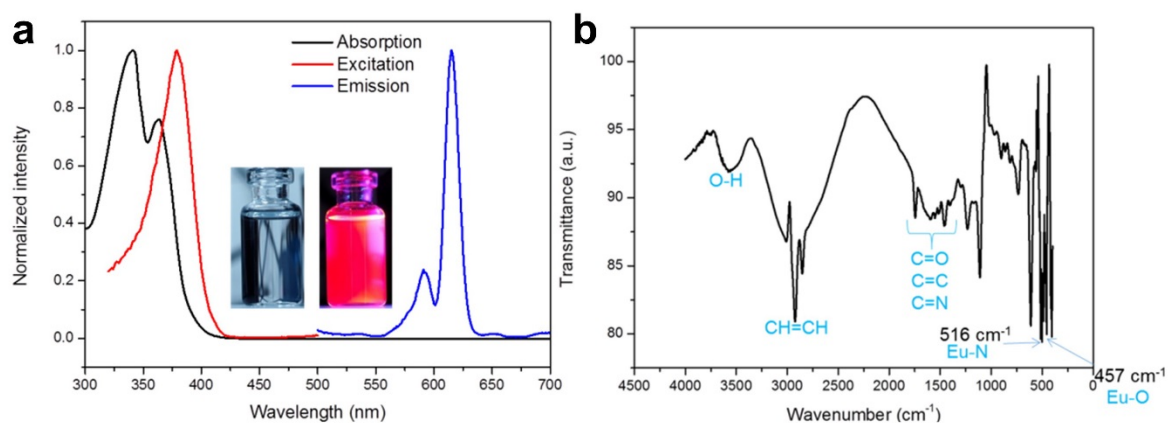

**Figure S10.** (a) Absorption, excitation and emission spectra of Eu(DBM)<sub>3</sub>Phen, and (b) its FT-IR spectrum.

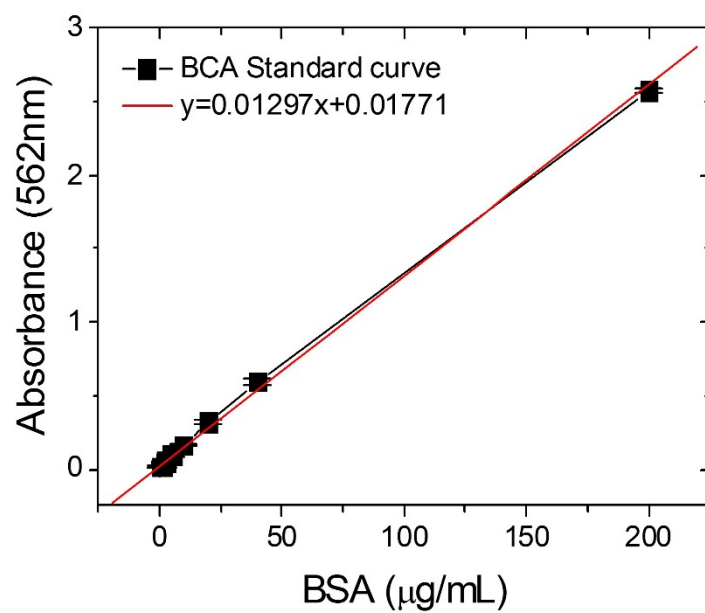

**Figure S11.** Bovine serum albumin (BSA) standard curve for the BCA protein assay.

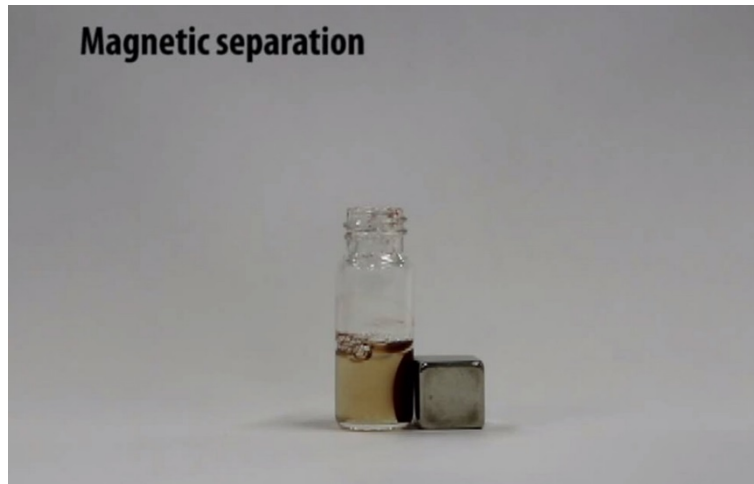

**Supplementary Movie S1.** Video clip showing the RBC separation from human whole blood.
